# Supplementary material
Source: PubMed Central journal article supplement (PMC2262989)
Supplement: mbc_E07-10-1042_1.pdf [file mbc_E07-10-1042_1.pdf]

**Supplementary Table I. *P. pastoris* strains used in supplementary data**

| Strain | Genotype                                                                        | Source                       |
|--------|---------------------------------------------------------------------------------|------------------------------|
| PPY12  | <i>arg4, his4</i>                                                               | (Gould <i>et al.</i> , 1992) |
| SMY169 | <i>PEX31::PEX31-HA(Zeo<sup>R</sup>), arg4, his4</i>                             | This study                   |
| SMY174 | <i>HIS4::P<sub>GAP</sub>-GFP-PEX31, arg4</i>                                    | This study                   |
| SMY248 | <i>PEX::PEX11-HA(Zeo<sup>R</sup>), HIS4::P<sub>GAP</sub>-GFP-PEX31, arg4</i>    | This study                   |
| SMY278 | <i>pex11Δ::Zeo<sup>R</sup>, arg4, his4</i>                                      | This study                   |
| SMY371 | <i>pex31Δ::Zeo<sup>R</sup>, HIS4::P<sub>GAP</sub>-PEX31-HA, arg4</i>            | This study                   |
| SMY393 | <i>PEX30::PEX30-GFP(ARG4), SEC61::SEC61-RFP(Hyg<sup>R</sup>), his4</i>          | This study                   |
| SMY404 | <i>PEX31::PEX31-GFP(ARG4), SEC61::SEC61-RFP(Hyg<sup>R</sup>), his4</i>          | This study                   |
| SMY405 | <i>PEX31::PEX31-GFP(ARG4), HIS4::PEX3-RFP</i>                                   | This study                   |
| SMY406 | <i>PEX30::PEX30-GFP(ARG4), HIS4::PEX3-RFP</i>                                   | This study                   |
| SMY411 | <i>HIS4::P<sub>GAP</sub>-GFP-PEX31, SEC61::SEC61-RFP(Hyg<sup>R</sup>), arg4</i> | This study                   |
| SMY419 | <i>HIS4::P<sub>GAP</sub>-GFP-PEX31, ARG4::PEX3-RFP</i>                          | This study                   |

Supplementary Figure 1. **Localization of Pex30p and Pex31p in glucose and oleate medium.** (A) Pex30p-GFP expressed from a genomically tagged locus was colocalized with a peroxisome marker, Pex3p-RFP (SMY406), or an ER marker, Sec61p-RFP (SMY393), in glucose- or oleate-grown cells. (B) Pex31p-GFP expressed from its genomically tagged locus was colocalized with Pex3p-RFP (SMY405) or Sec61p-RFP (SMY404) in glucose- or oleate-grown cells. (C) Pex31p-GFP ectopically expressed from the *GAP* promoter was colocalized with Pex3p-RFP (SMY419) or Sec61p-RFP (SMY411) in glucose- or oleate-grown cells. DIC, differential interference contrast. Scale bar, 5  $\mu$ m.

Supplementary Figure 2. **Pex31p interacts with Pex19p.** Wild-type (WT, PPY12), genomically tagged *PEX31-HA* (SMY169) and ectopically overexpressed *PEX31-HA* (SMY371) cells were induced in oleate medium and analyzed by immunoprecipitation (IP) with antibody against HA. Pex31p-HA and Pex19p were visualized by western blotting. Asterisk, IgG light chain.

Supplementary Figure 3. **Pex11p is required for normal oleate-induced peroxisomes and interacts with Pex31p.** (A) Wild-type (WT, PPY12) and *pex11 $\Delta$*  (SMY278) cells were induced in methanol or oleate medium overnight for peroxisome proliferation and analyzed by indirect immunofluorescence after labeling with anti-Pex3p antibody and Alexa Fluor 488-conjugated secondary antibody. DIC, differential interference contrast. Scale bar, 5  $\mu$ m. (B) Wild-type and *pex11 $\Delta$*  cells were induced in oleate medium overnight and analyzed by EM at a magnification of 17,000. P, peroxisome. (C) *GFP-PEX31* was expressed ectopically in WT cells (SMY174) or in cells whose endogenous *PEX11* was tagged with HA (SMY248). Cells were induced in oleate medium overnight and analyzed by immunoprecipitation (IP) with antibody against HA. Pex30p-GFP, Pex31p-GFP and Pex11p-HA were visualized by western blotting. Asterisk, IgG light chain; double asterisk, IgG heavy chain.

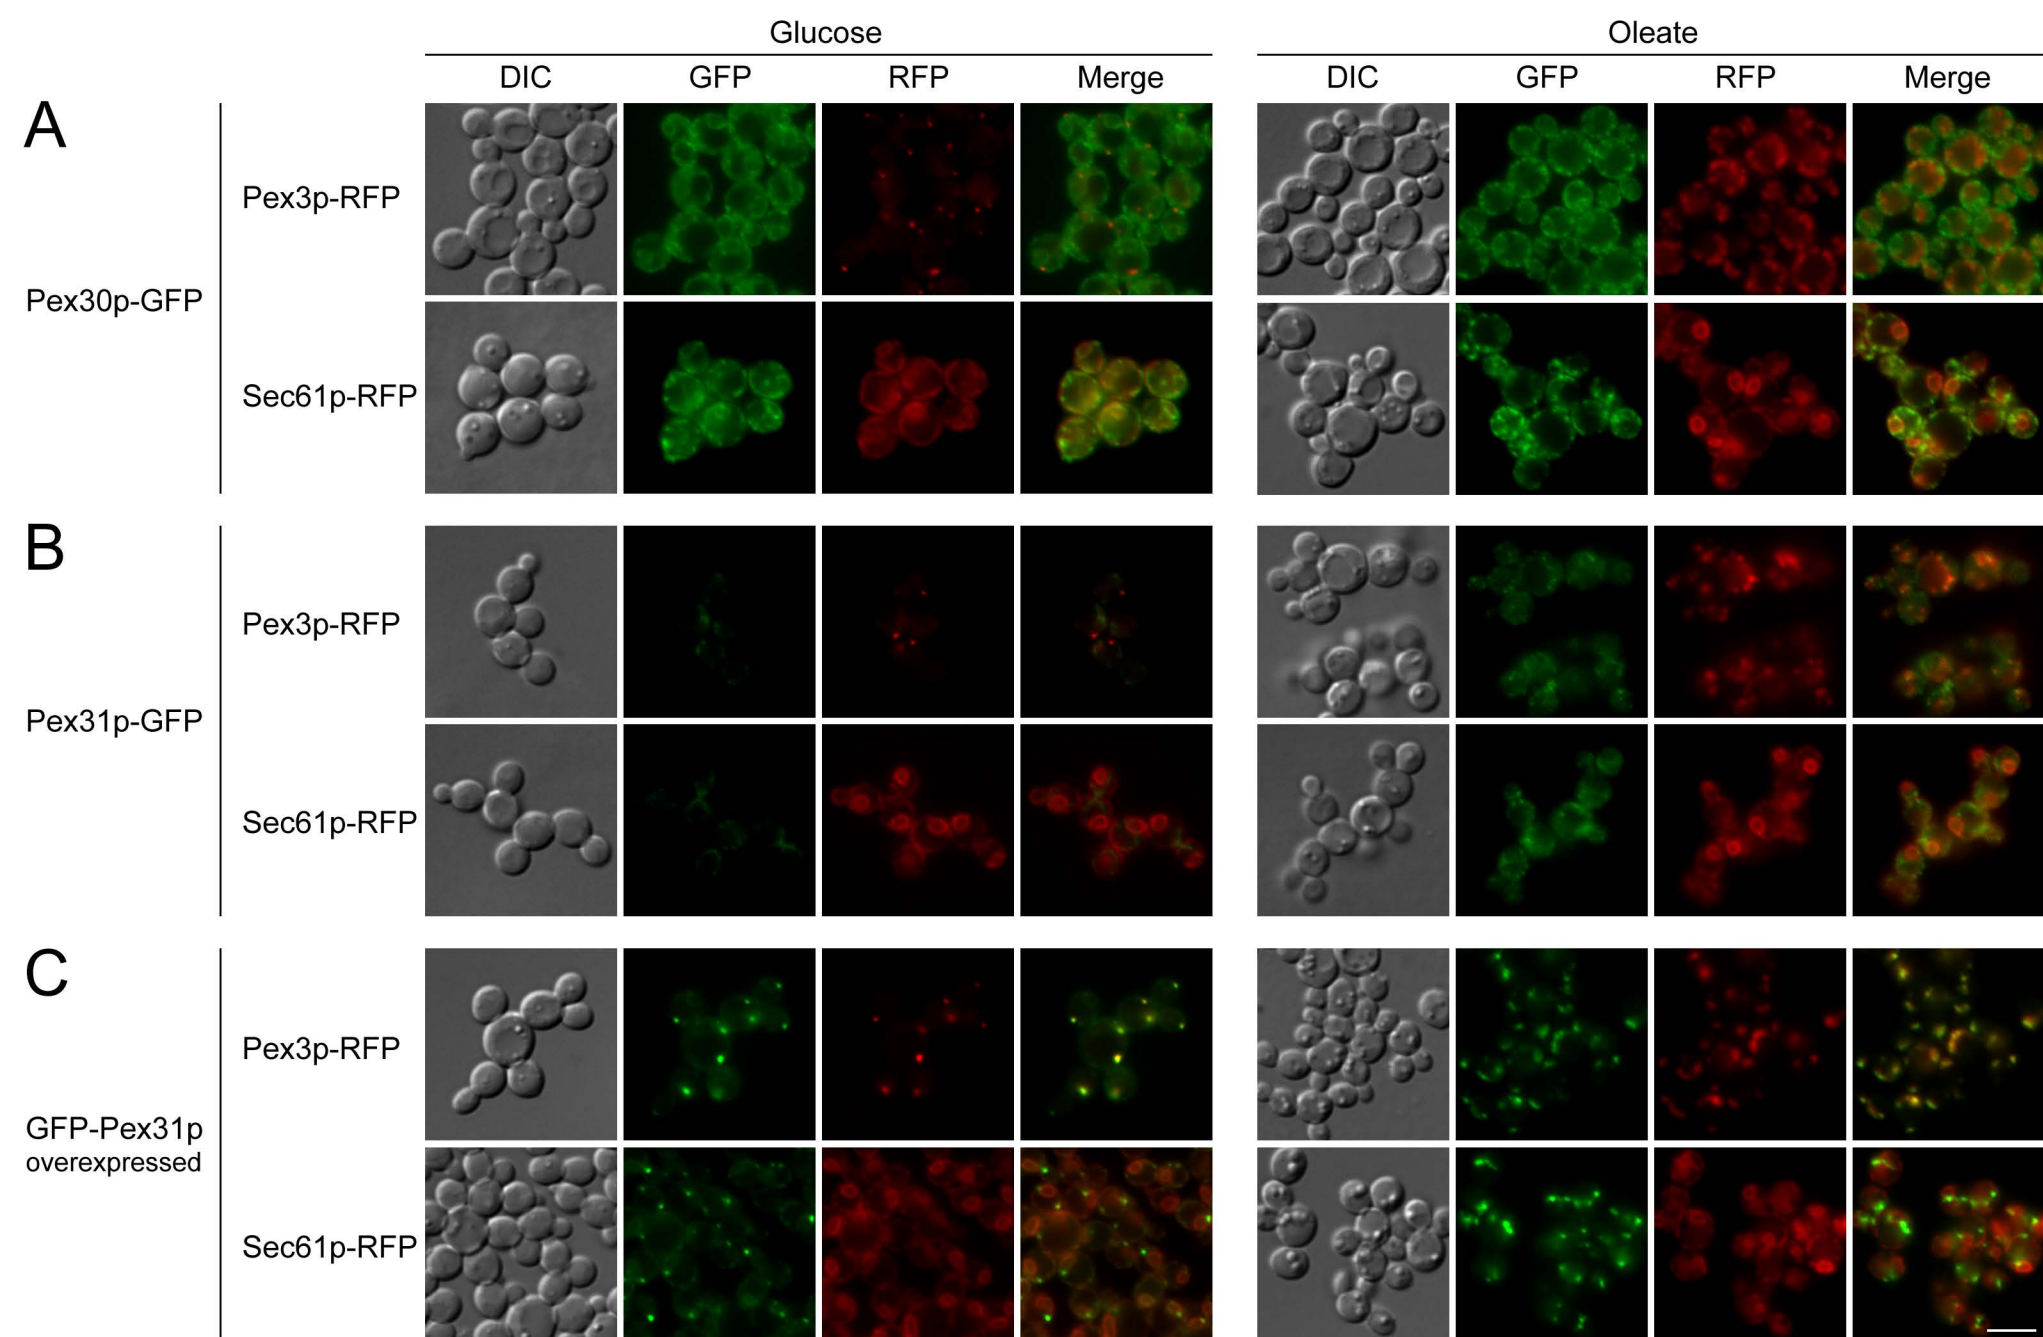

Supplementary Figure 1

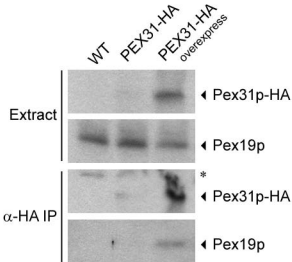

Supplementary Figure 2

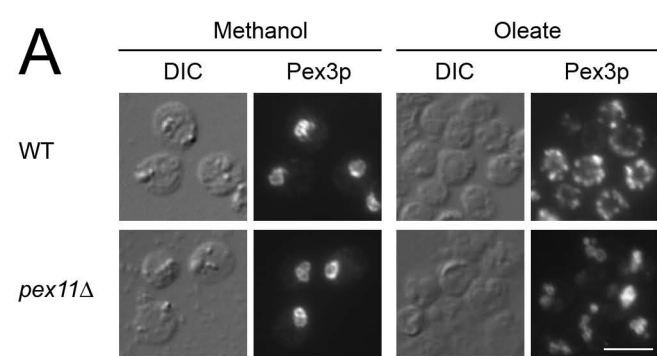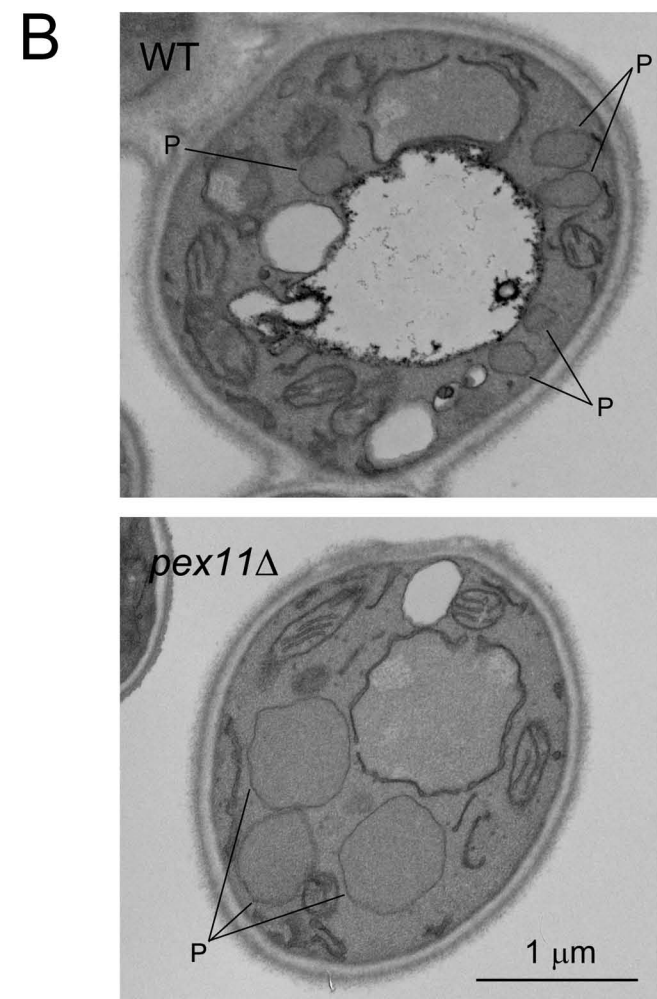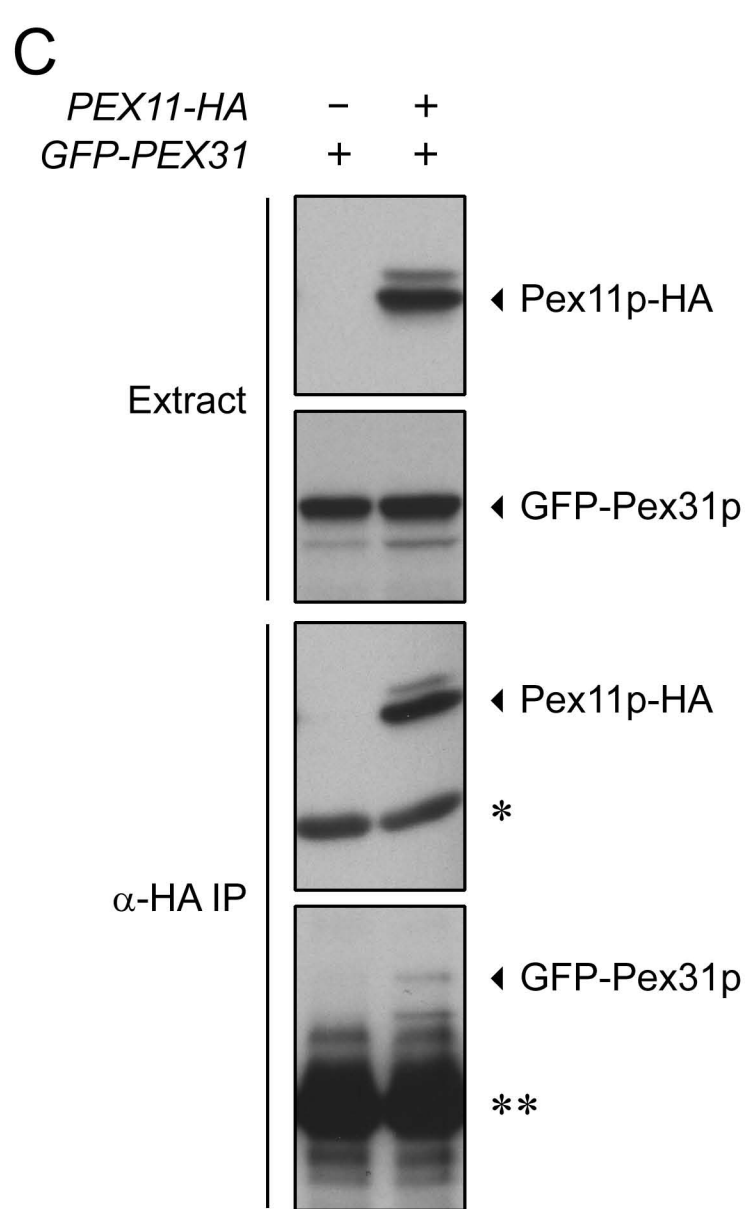

Supplementary Figure 3
